# Supplementary material for: The Alzheimer’s disease metabolic brain pattern in mild cognitive impairment
Source: PubMed Central journal article supplement — J Cereb Blood Flow Metab. 2017 Sep 20;37(12):3643–8. doi: 10.1177/0271678X17732508 (PMC5718332; doi:10.1177/0271678x17732508), 2017-09-20
Supplement: supplementary_material_732508.pdf [file supplementary_material_732508.pdf]

**Supplementary Table 1**

| Group                                          | NA               | ncMCI                    | eMCI                      | IMCI                     | AD               |
|------------------------------------------------|------------------|--------------------------|---------------------------|--------------------------|------------------|
| N                                              | 42               | 27                       | 34                        | 61                       | 55               |
| Age                                            | 68.29±9.64       | 72.00±6.61               | 75.19±6.70                | 75.18±6.70               | 73.43±7.36       |
| Gender; n male (%)                             | 11 (26)          | 15 (55)                  | 8 (23)                    | 23 (38)                  | 19 (34)          |
| MMSE at baseline*                              | 29.0 (29.0-30.0) | 27.0 (26.0-28.0)         | 26.3 (24.7-28.0)          | 25.9 (24.3-27.1)         | 20.0 (18.0-23.0) |
| Years of follow-up                             |                  | 7.53±1.51<br>(5.02-9.79) | 4.86±1.86<br>(2.04-10.30) | 3.24±1.39<br>(0.51-7.05) |                  |
| Years to AD conversion                         |                  |                          | 3.08±1.33<br>(2.02-8.25)  | 1.15±1.33<br>(0.08-1.99) |                  |
| MMSE at conversion*                            |                  |                          | 22.0 (21.0-24.0)          | 23 (21-24)               |                  |
| N subjects with ADRP<br>z≥0.80 (positive test) | 6                | 9                        | 28                        | 52                       | 50               |
| N subjects with ADRP<br>z<0.80 (negative test) | 36               | 18                       | 6                         | 9                        | 5                |
| % correctly classified                         | 85.71            | 66.67                    | 82.35                     | 85.21                    | 90.91            |
| ADRP score<br>(mean±SD)                        | 0±1              | 0.59±1.07                | 1.87±1.10                 | 2.00±1.32                | 2.92±1.63        |

Values are given as mean±standard deviation (range) unless specified by (\*) which indicates median (interquartile range)

**Supplementary Figures**

**Figure 1: ADRP Correlates to MMSE Scores**

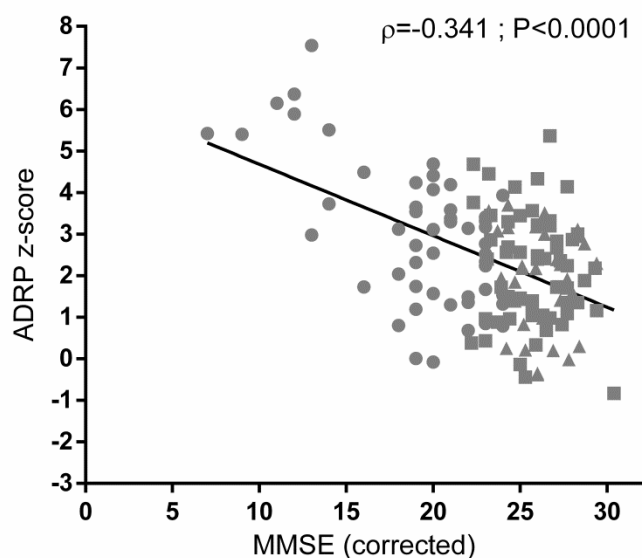

ADRP z-scores in eMCI (triangles), IMCI (squares), and AD patients (circles) correlate significantly to MMSE scores.

**Figure 2: Correlations in the Non-Converting MCI Group**

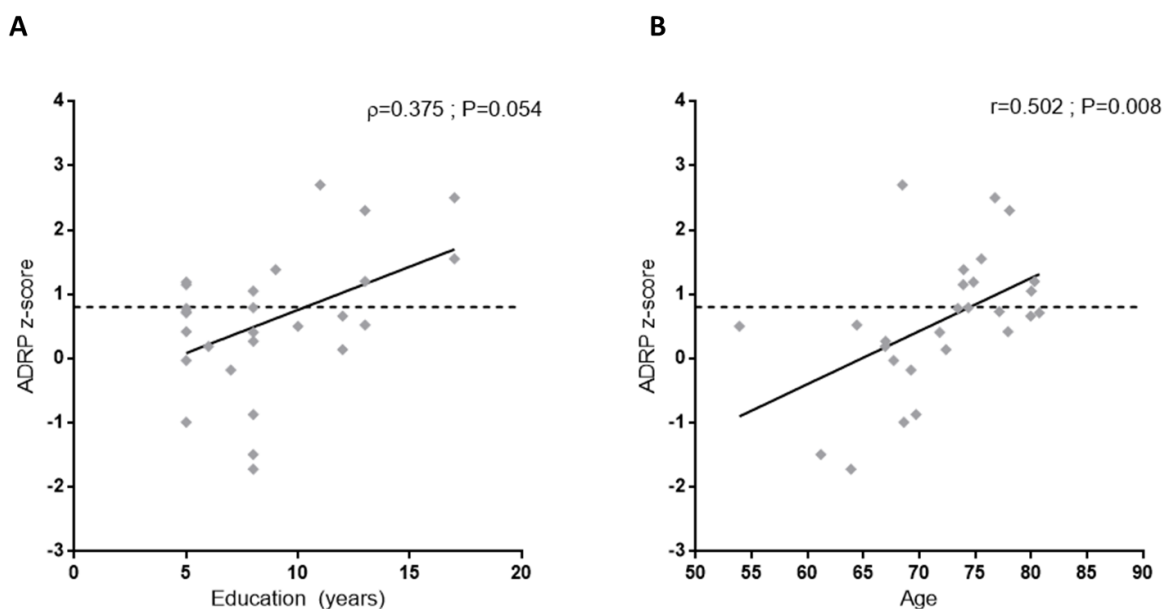

A) There is a trend of increasing ADRP z-scores in non-converting MCI patients with higher educations.

B) ADRP z-scores were significantly correlated to age in the ncMCI group.
